# Supplementary material
Source: ML conference proceedings conference paper supplement (https://proceedings.neurips.cc/paper_files/paper/2017/hash/4edaa105d5f53590338791951e38c3ad-Abstract.html)
Supplement: Supplementary file [file 4edaa105d5f53590338791951e38c3ad-Supplemental.zip]

# Supplementary Material for "OnACID: Online Analysis of Calcium Imaging Data in Real Time"

Andrea Giovannucci, Johannes Friedrich, Matthew Kaufman, Anne K. Churchland,  
Dmitri Chklovskii, Liam Paninski, and Eftychios A. Pnevmatikakis

## A Algorithmic description

Here we present in pseudocode the various steps of the online processing pipeline. For ease of exposition, some details and speedup tricks used in the actual implementation have been omitted.

Algorithms S1 and S2 describe the simple greedy procedure for partitioning the components into disjoint groups where the elements of each group do not overlap spatially with each other. This procedure is used for updating the traces of the neurons in vector form (Alg. S3) leading to substantial speed benefits. Algorithm S4 describes the procedure of detecting and screening possible new components. Finally, Algorithm S5 describes the process of updating the shapes, similar to [3].

---

**Algorithm S1** DETERMINEGROUPS

---

**Require:** Spatial components matrix  $A$ , number of components  $K$

```
1:  $\mathcal{G} = \emptyset$ 
2: for  $i = 1 \rightarrow K$  do
3:    $\mathcal{G} \leftarrow \text{JOINGROUPS}(A[:, 1 : i - 1], \mathcal{G}, i - 1, \mathbf{a}_i)$ 
4: end for
5: return  $\mathcal{G}$ 
```

---

---

**Algorithm S2** JOINGROUPS

---

**Require:** Spatial components matrix  $A$ , current groups  $\mathcal{G}$ , number of components  $K$ , new component  $\mathbf{a}$

```
1:  $N_G = |\mathcal{G}|$ 
2: repeat = True
3:  $g \leftarrow 1$ 
4: while repeat do
5:   if  $g \leq N_G$  then
6:     if  $\mathbf{a}^\top \mathbf{a}_l = 0, \forall l \in G_j$  then
7:        $G_g \leftarrow G_g \cup \{K + 1\}$ 
8:       repeat = False
9:     else
10:       $g \leftarrow g + 1$ 
11:    end if
12:  else
13:     $N_G \leftarrow N_G + 1$ 
14:     $G_{N_G} = \{K + 1\}$ 
15:     $\mathcal{G} \leftarrow \{\mathcal{G}, G_{N_G}\}$ 
16:    repeat = False
17:  end if
18: end while
19: return  $\mathcal{G}$ 
```

---

---

**Algorithm S3** UPDATETRACES

---

**Require:** Spatial footprints matrix  $\tilde{A} = [A, \mathbf{b}]$ , current value of temporal traces  $\tilde{\mathbf{c}} = [\mathbf{c}; f]$ , current data frame  $\mathbf{y}$ , groups  $\mathcal{G}$ , tolerance level  $\varepsilon$ .

- 1:  $\mathbf{u} = \tilde{A}^\top \mathbf{y}$
- 2:  $V = \tilde{A}^\top \tilde{A}$
- 3:  $\mathbf{V} = \text{diag}\{V\}$
- 4:  $\tilde{\mathbf{c}}_{old} \leftarrow 0$
- 5: **while**  $\|\tilde{\mathbf{c}} - \tilde{\mathbf{c}}_{old}\| \geq \varepsilon \|\tilde{\mathbf{c}}_{old}\|$  **do**
- 6:    $\tilde{\mathbf{c}}_{old} \leftarrow \tilde{\mathbf{c}}$
- 7:   **for**  $i = 1 \rightarrow |\mathcal{G}|$  **do**
- 8:      $\tilde{c}[G_i] = \max\left(\tilde{c}[G_i] + \frac{\mathbf{u}[G_i] - V[G_i, :]\tilde{\mathbf{c}}}{\mathbf{v}[G_i]}, 0\right)$  ▷ (Division is pointwise)
- 9:   **end for**
- 10: **end while**
- 11: **return**  $\tilde{\mathbf{c}}$

---

---

**Algorithm S4** DETECTNEWCOMPONENTS

---

**Require:** Spatial footprints matrix  $[A, \mathbf{b}]$ , temporal traces matrix  $[C; \mathbf{f}]$ , current number of components  $K$ , current state of groups  $\mathcal{G}$ , current residual buffer  $R_{\text{buf}}$ , current data frame  $\mathbf{y}$ , sufficient statistics  $W, M$ .  
Parameters: radius of Gaussian kernel  $\tau$ , threshold for correlation in space  $\theta_s$ , threshold for correlation in time  $r_t$ .

- 1: repeat = **True**
- 2:  $R_{\text{buf}} \leftarrow [R_{\text{buf}}[:, 1 : l_b - 1], \mathbf{y} - [A, \mathbf{b}][C; \mathbf{f}][:, \text{end}]]$  ▷ Update residual buffer
- 3:  $M_d = \text{MEDIAN}(R_{\text{buf}})$
- 4:  $R_{\text{buf}} \leftarrow R_{\text{buf}} - M_d$  ▷ Subtract median along time for every pixel
- 5:  $V \leftarrow \text{FILTER}(R_{\text{buf}}, \text{GAUSSIANKERNEL}(\tau))$  ▷ Filter residual in space
- 6:  $E \leftarrow \sum_i V[:, i]^2$  ▷ Compute energy value for each pixel
- 7: **while** repeat **do**
- 8:    $(i_x, i_y) = \arg \max E$  ▷ Find the point of maximum variance
- 9:    $N_{(i_x, i_y)} = \{(x, y) : |x - i_x| \leq \tau, |y - i_y| \leq \tau\}$  ▷ Define a neighborhood around  $(i_x, i_y)$
- 10:    $[\mathbf{a}_{\text{new}}, \mathbf{c}_{\text{new}}] = \text{NNMF}(R_{\text{buf}}[N_{(i_x, i_y)}, :], 1)$  ▷ Perform a local rank-1 NMF
- 11:    $r = \text{CORR}(\mathbf{a}_{\text{new}}, \text{MEAN}(R_{\text{buf}}))$  ▷ Compute correlation coefficient in space
- 12:    $o = \text{Find}(\mathbf{a}_{\text{new}}^\top A[N_{(i_x, i_y)}, :] > 0)$  ▷ Find components that overlap
- 13:   **if**  $\exists j \in o : \text{CORR}(\mathbf{c}_{\text{new}}, C[j, t - l_b + 1 : t]) > r_t$  **then**
- 14:      $r \leftarrow 0$  ▷ Detect possible duplicates and stop procedure
- 15:   **end if**
- 16:   **if**  $r > \theta_s$  **then** ▷ New component is accepted
- 17:     Zero-pad  $\mathbf{a}_{\text{new}}$  and  $\mathbf{c}_{\text{new}}$  to match dimensionality
- 18:      $K \leftarrow K + 1$
- 19:      $\mathcal{G} \leftarrow \text{JOINGROUPS}(A, \mathcal{G}, \mathbf{a}_{\text{new}})$
- 20:      $A \leftarrow [A, \mathbf{a}_{\text{new}}]$
- 21:      $C \leftarrow [C; \mathbf{c}_{\text{new}}]$
- 22:      $R_{\text{buf}} \leftarrow R_{\text{buf}} - \mathbf{a}_{\text{new}} \mathbf{c}_{\text{new}}$
- 23:      $V \leftarrow V - \mathbf{a}_{\text{new}}^2 \|\mathbf{c}_{\text{new}}\|^2$
- 24:      $W, M \leftarrow \text{UPDATESUFFSTATISTICS}(W, M, \mathbf{y}_t, \mathbf{c}_{\text{new}})$  ▷ Equation (5)
- 25:   **else**
- 26:     repeat = **False**
- 27:   **end if**
- 28: **end while**
- 29: **return**  $[A, \mathbf{b}], [C, \mathbf{f}], K, \mathcal{G}, R_{\text{buf}}, W, M$

---

---

**Algorithm S5** UPDATESHAPES

---

**Require:** Sufficient statistics  $W, M$ , current value of spatial footprints  $\tilde{A} = [A, b]$ , list of components to be updated  $l$ , maximum number of iterations  $m_{\text{iter}}$

```

1: iter  $\leftarrow$  0
2: while iter <  $m_{\text{iter}}$  do
3:   for  $i \in l$  do
4:      $\mathbf{p} = \text{find}(\tilde{A}[:, i] > 0)$   $\triangleright$  Find the pixels where component  $i$  can be non-zero
5:      $\tilde{A}[\mathbf{p}, i] = \max \left( \tilde{A}[\mathbf{p}, i] + \frac{W[\mathbf{p}, i] - \tilde{A}[\mathbf{p}, :] M[:, i]}{M[i, i]}, 0 \right)$ 
6:   end for
7:   iter  $\leftarrow$  iter + 1
8: end while
9: return  $\tilde{A}$ 

```

---

## B Dataset Details

**Parietal cortex dataset:** Data was obtained from the parietal cortex of a transgenic GCaMP6f-expressing mouse during a behavioral task. Field of view was approximately  $500 \times 500 \mu\text{m}^2$  ( $512 \times 512$  pixels) in size and at depth  $125 \mu\text{m}$  below the dura surface. Horizontal scans of the laser were performed using a resonant galvanometer, resulting in a frame acquisition rate of 30Hz. More details can be found in [2].

**Hippocampal dataset:** Data was obtained from the hippocampus of a transgenic GP2.11 (Thy1-GCaMP3) mouse generated by the Janelia Farms GENIE Project (Jackson Labs, C57BL/6J-Tg(Thy1-GCaMP3)GP2.11Dkim/J). FOV was approximately  $500 \times 500 \mu\text{m}^2$ , of size  $512 \times 512$  pixels, cropped to  $483 \times 492$  pixels after rigid registration and removal of empty border lines. Horizontal scans of the laser were performed using a resonant galvanometer, resulting in a frame acquisition rate of 30Hz. More details can be found in [1].

## C Supplementary Movie

**Evolution of the OnACID algorithm on toy simulated data:** Top. Raw movie (left). Denoised movie reconstructed from all components (middle). Noiseless ground truth (right). Bottom. Residual movie (left). Inferred (middle) and ground truth (right) spatial components. A  $64 \times 64$  pixel FOV containing 35 artificial neurons was simulated for this example. Movie is truncated in time for space reasons.

## D Simulation details

We generated a dataset of size  $256 \times 256$  pixels and duration  $T = 2000$  frames containing  $N = 400$  neurons. The neural centers  $\{\mathbf{c}\}_1^N$  were generated using a Halton sequence to cover the space uniform pseudo-randomly.

The unnormalized neural shapes were modeled as the difference of two 2D-Gaussians.

$$\tilde{a}(\mathbf{x}) = \exp \left( -\frac{1}{2} (\mathbf{x} - \mathbf{c})^\top \text{diag}(\sigma_x^{-1}, \sigma_y^{-1}) (\mathbf{x} - \mathbf{c}) \right) \quad (1)$$

$$- k \exp \left( -\frac{1}{2} (\mathbf{x} - \mathbf{c})^\top \text{diag}((0.75\sigma_x)^{-1}, (0.75\sigma_y)^{-1}) (\mathbf{x} - \mathbf{c}) \right) \quad (2)$$

where  $\mathbf{x}$  denotes the position of the considered pixel. To incorporate heterogeneity the standard-deviation  $\sigma_x$  and  $\sigma_y$  in  $x$ - and  $y$ -direction of the wider Gaussian was drawn i.i.d. uniform randomly from the interval  $[2.5, 3.5]$ . These values were multiplied by 0.75 to obtain the standard-deviation of the smaller subtracted Gaussian. The magnitude  $k$  of the subtracted Gaussian was drawn i.i.d. uniform randomly from the interval  $[0.2, 0.8]$  for each neuron.

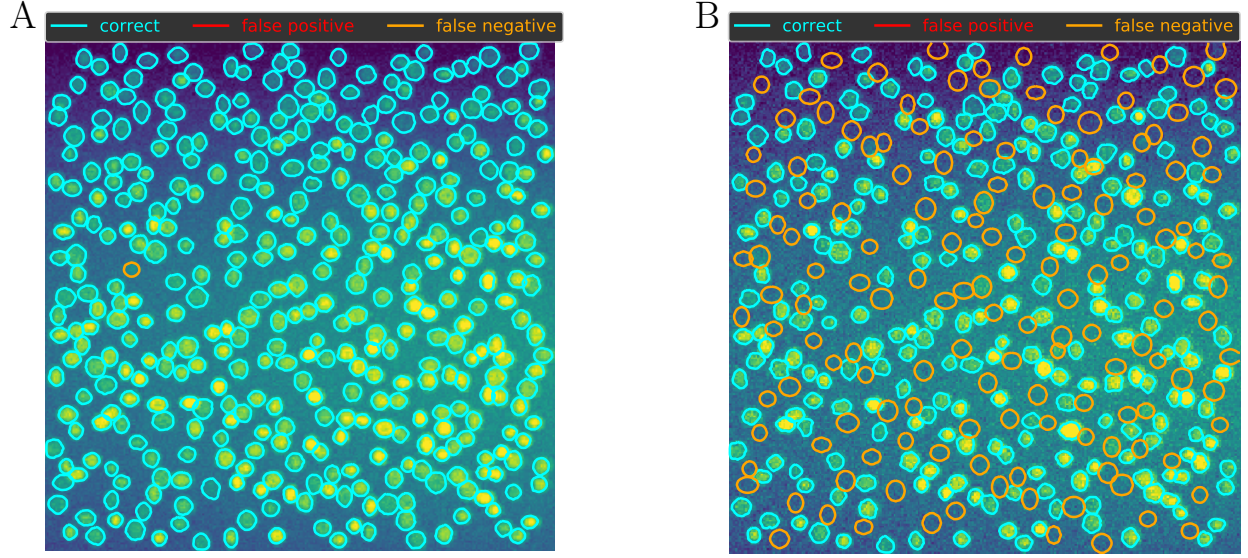

Figure S1: Simulated data. Detected components in batch mode. A) Full data B) Short initial batch.

The spike train  $\mathbf{s}$  of each neuron was drawn from a homogeneous Poisson process. The neural firing rate was 0.5 Hz and the frame rate 30 Hz. The calcium traces  $C$  were obtained by convolving the spike trains  $S$  with an exponentially decaying kernel with time constant 1 s.

The background  $B$  was modeled as rank 1 term, where the temporal and spatial component were each drawn from a Kronecker Gaussian process with RBF kernel. The temporal length scale was 300 frames and the spatial length scale 50 pixels. Finally, the simulated raw data is the sum of background  $B$  and neural contribution  $AC$  corrupted by Gaussian noise,  $Y \sim \mathcal{N}(B + AC, 0.2^2)$ .

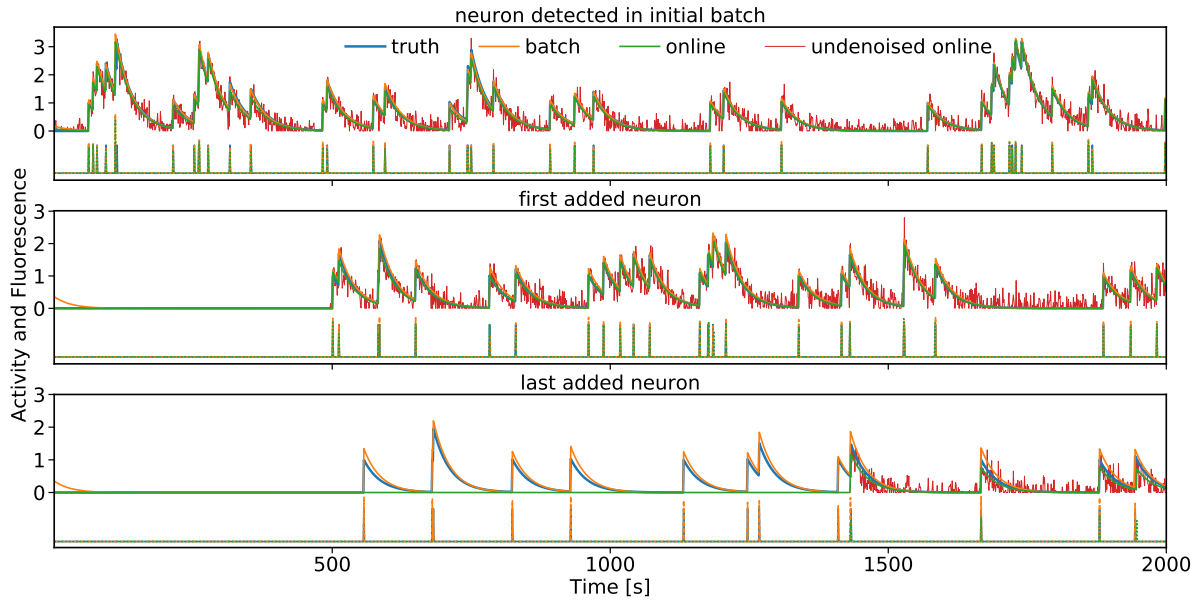

Figure S2: Simulated data. Traces of three neurons selected by time of detection. Upper traces show demixed (red), denoised (orange, green) and ground truth (blue) calcium fluorescence. Lower traces show deconvolved neural activity using the same coloring scheme.

## E Detailed comparison between OnACID and manual annotations for the hippocampal 2-photon dataset

In the following pages, Figures S3-S8 show the detailed matches and mismatches between OnACID and the two manual annotations, as well as the two manual annotations against each other.

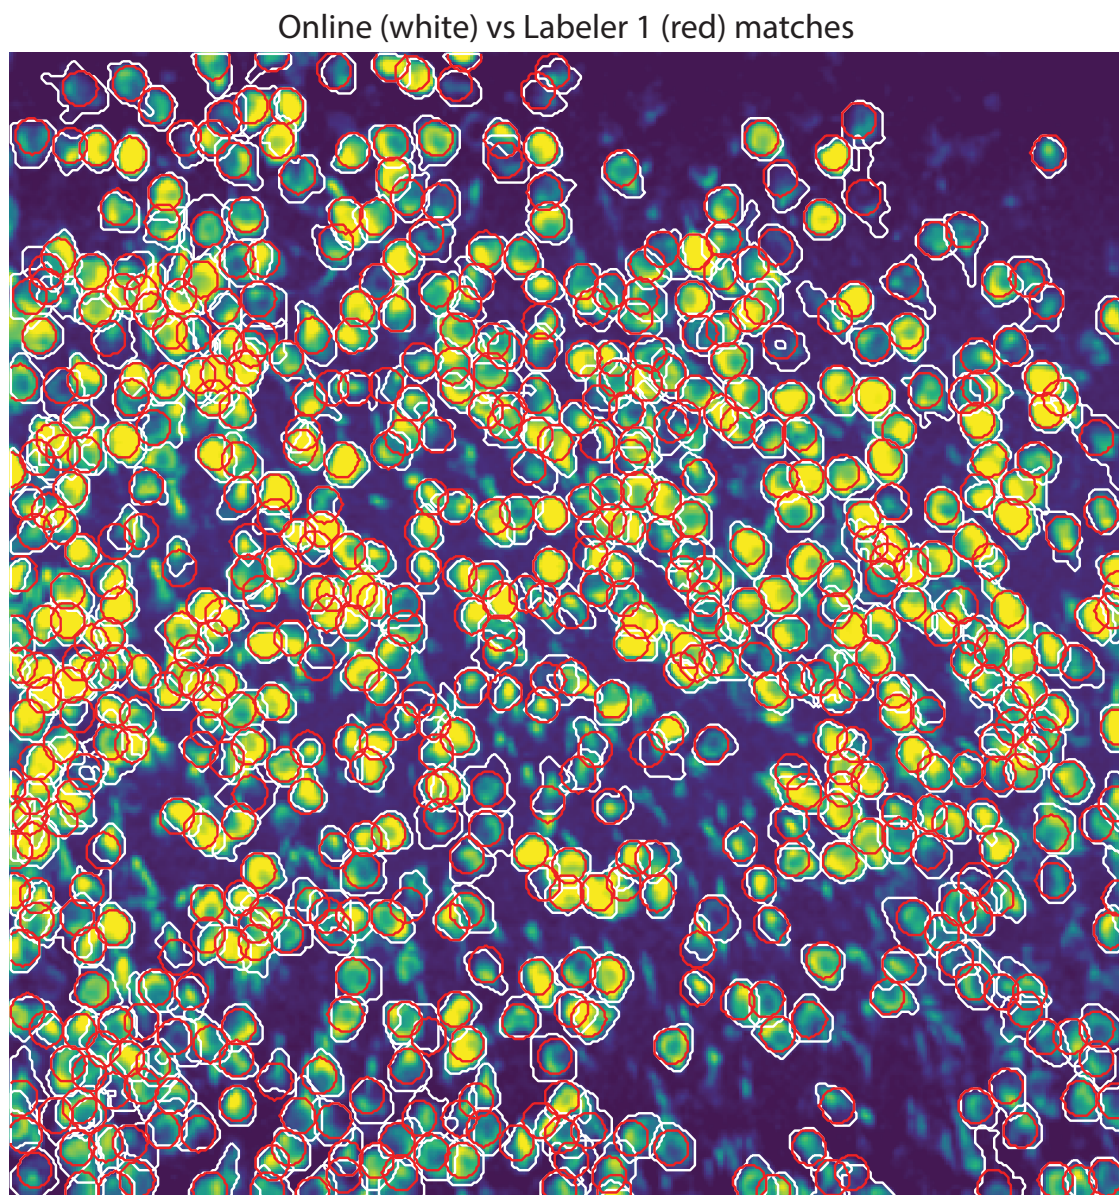

Figure S3: Matches between OnACID (white) and Labeler 1 (red).



Online (white) vs Labeler 1 (red) mis-matches

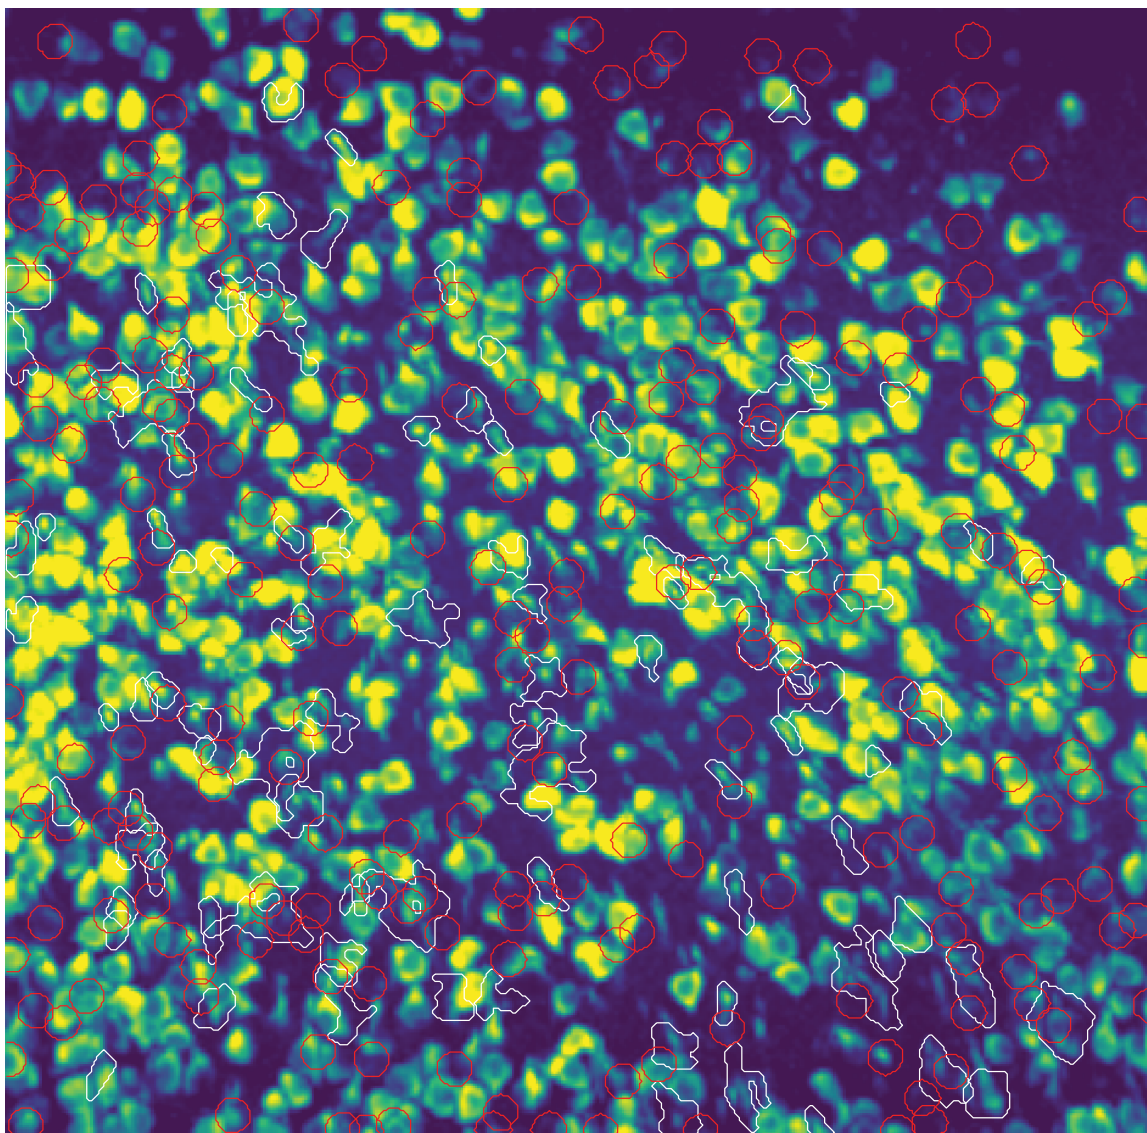

Figure S4: Mismatches between OnACID (white) and Labeler 1 (red).

Online (white) vs Labeler 2 (red) matches

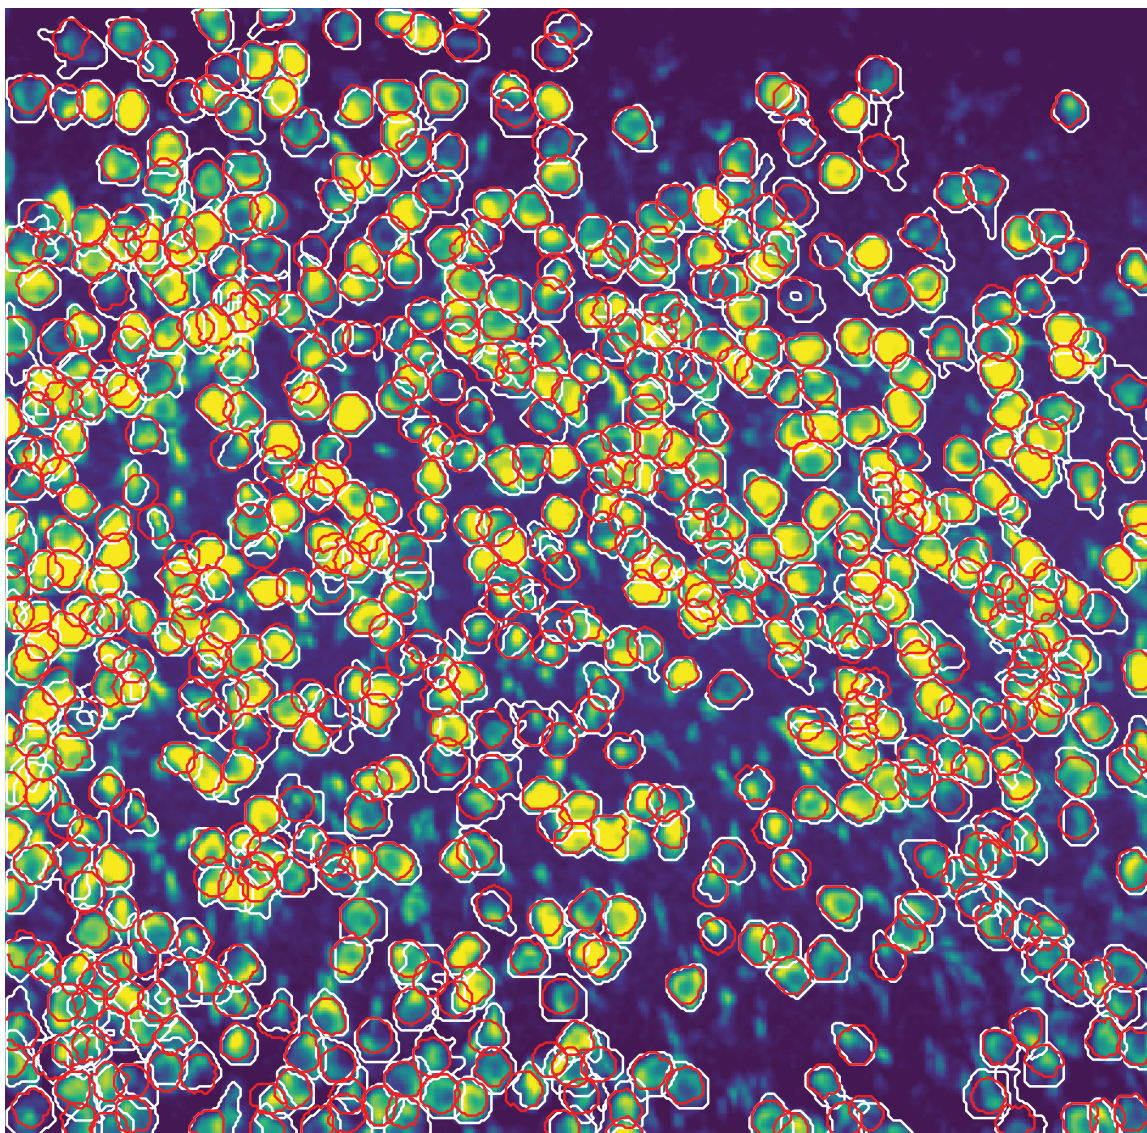

Figure S5: Matches between OnACID (white) and Labeler 2 (red).



Online (white) vs Labeler 2 (red) mis-matches

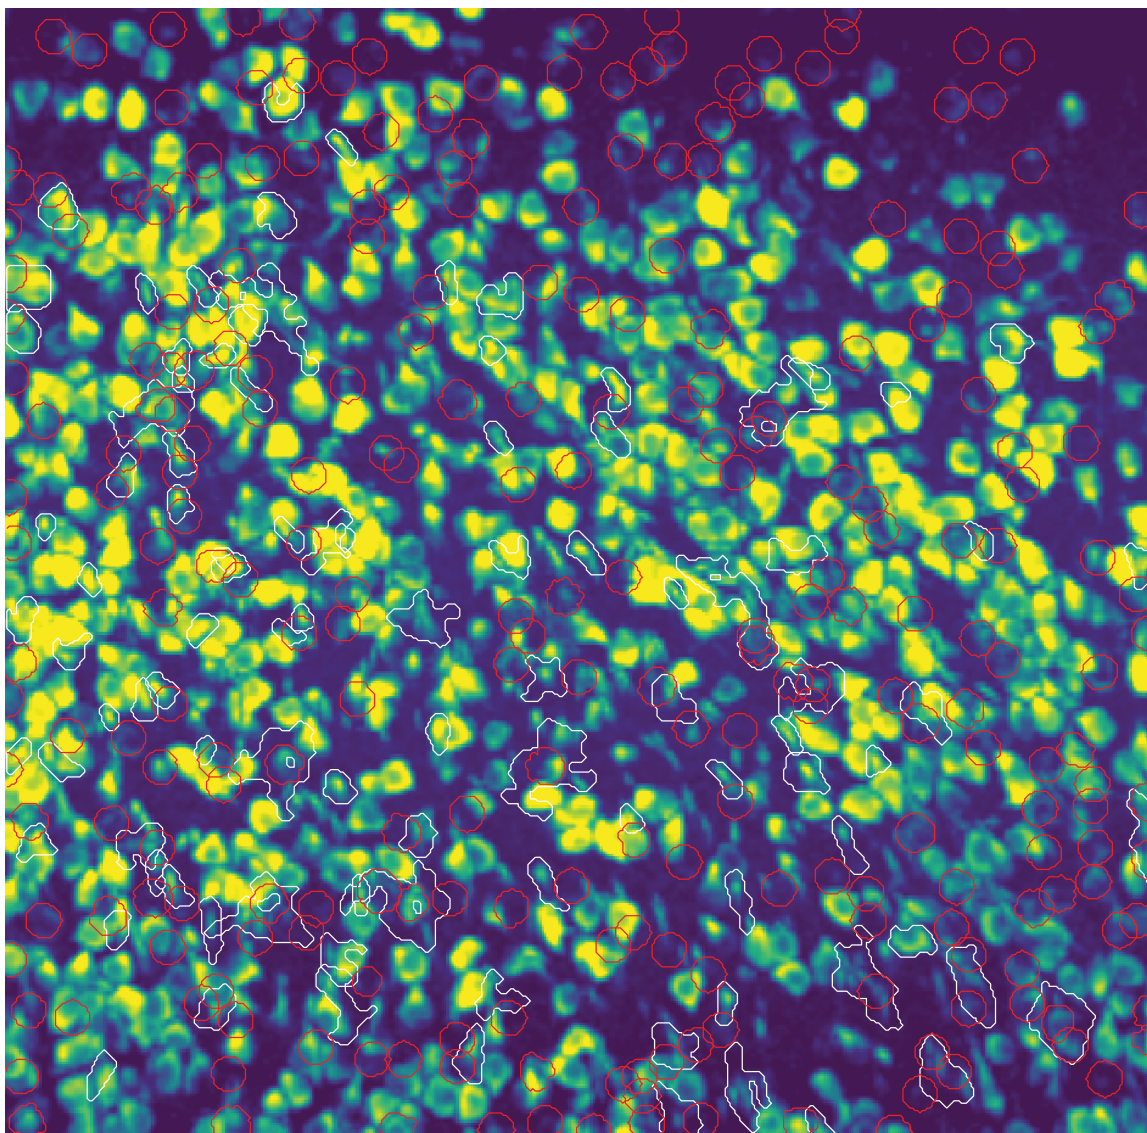

Figure S6: Mismatches between OnACID (white) and Labeler 2 (red).



Labeler 1 (red) vs Labeler 2 (white) matches

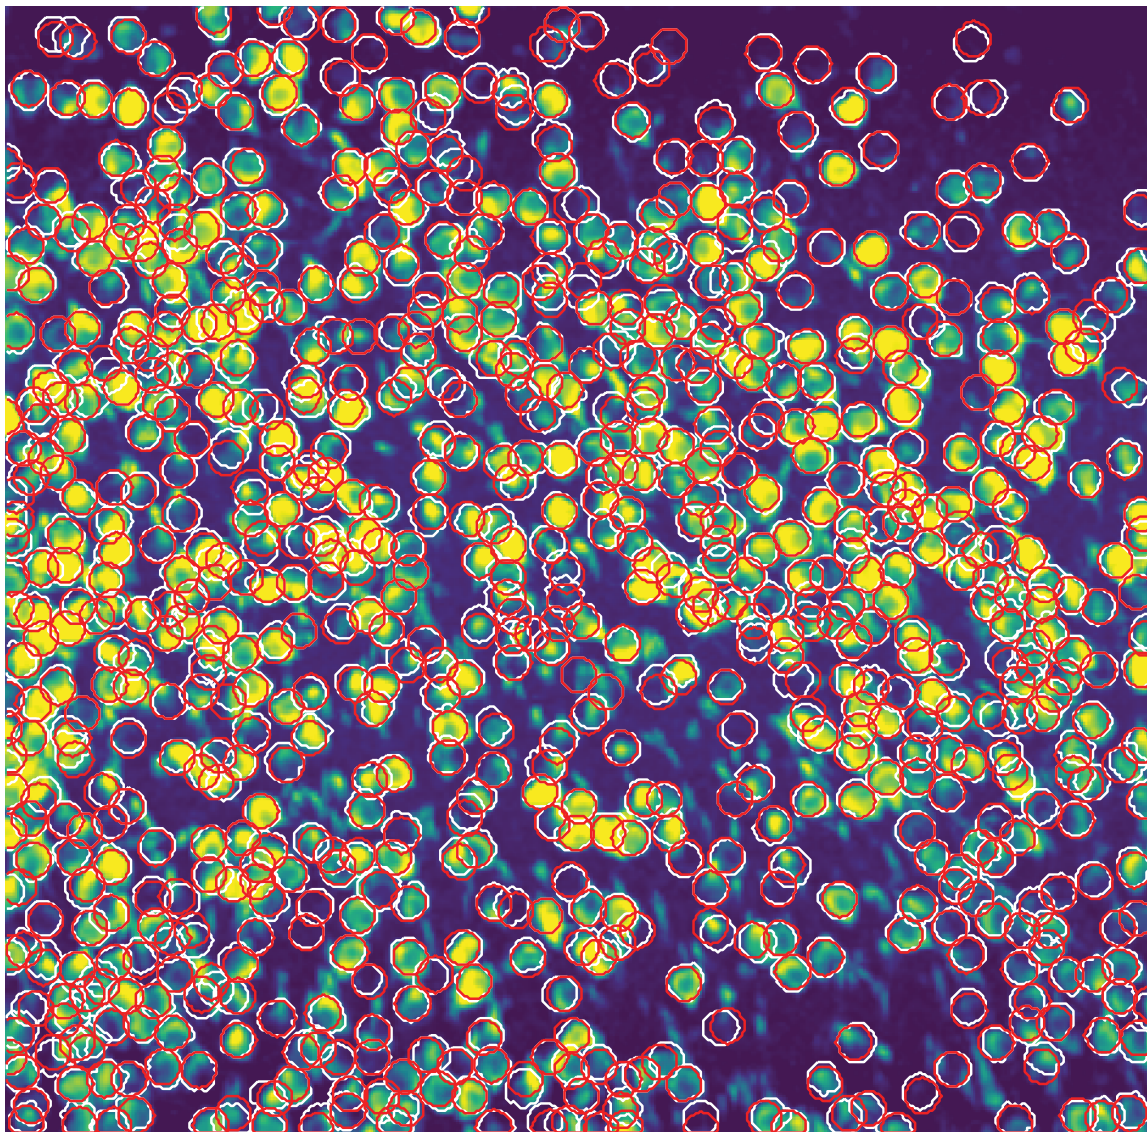

Figure S7: Matches between Labeler 1 (red) and Labeler 2 (white). The two labelers annotated the dataset independently and have a high degree of matching ( $F_1 = 0.89$ ). The contour shapes are also similar for both annotators, as expected from the labeling process using the ImageJ Cell Wand tool.

Labeler 1 (red) vs Labeler 2 (white) mis-matches

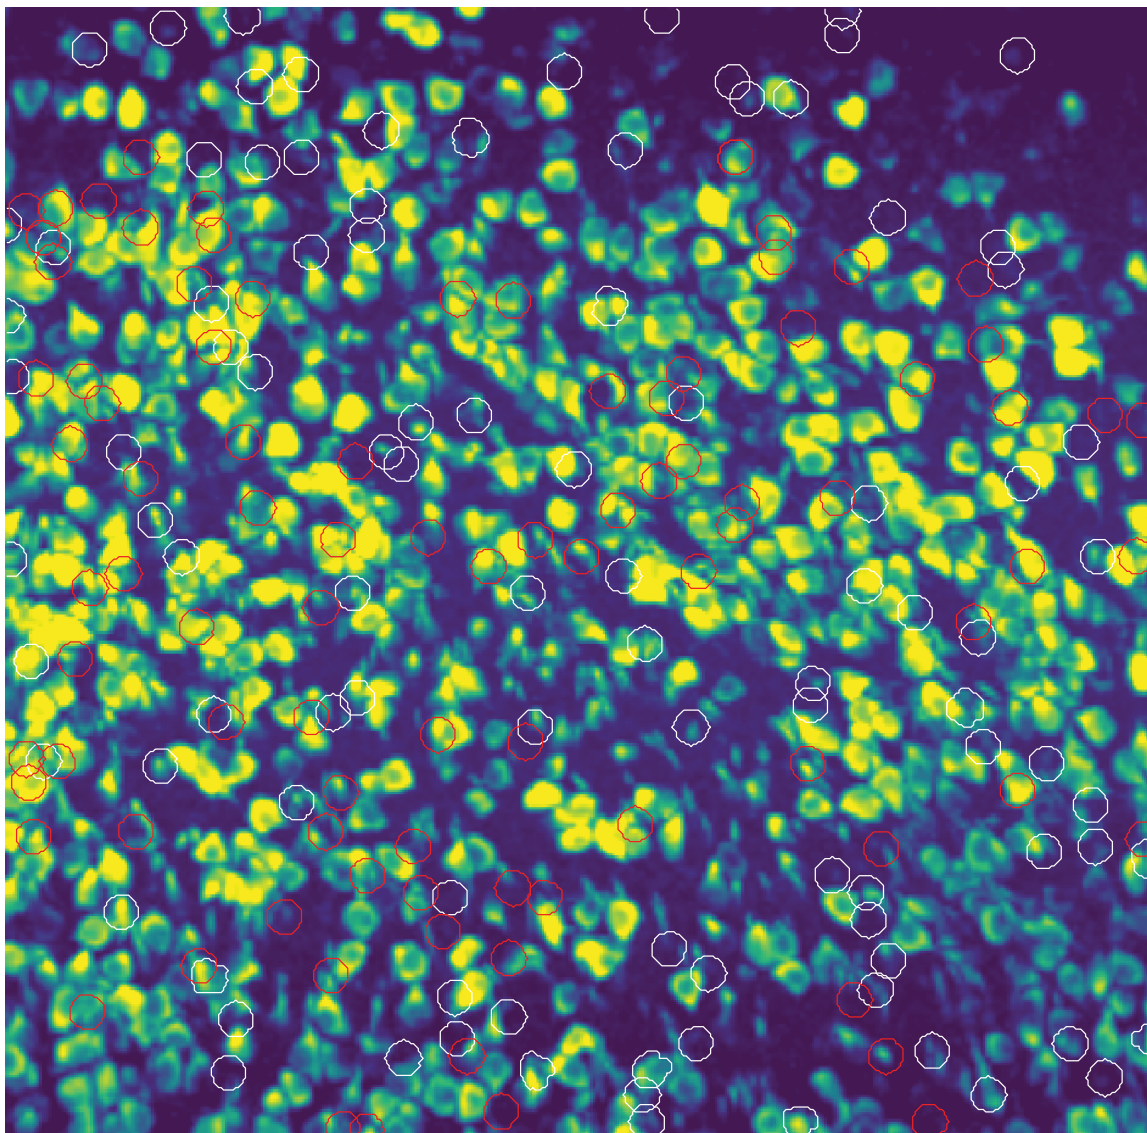

Figure S8: Mismatches between Labeler 1 (red) and Labeler 2 (white).



## F Detailed comparison between OnACID and manual annotations for the parietal cortex 2-photon dataset

In the following pages, Figures S9-S14 show the detailed matches and mismatches between OnACID and the two manual annotations, as well as the two manual annotations against each other.

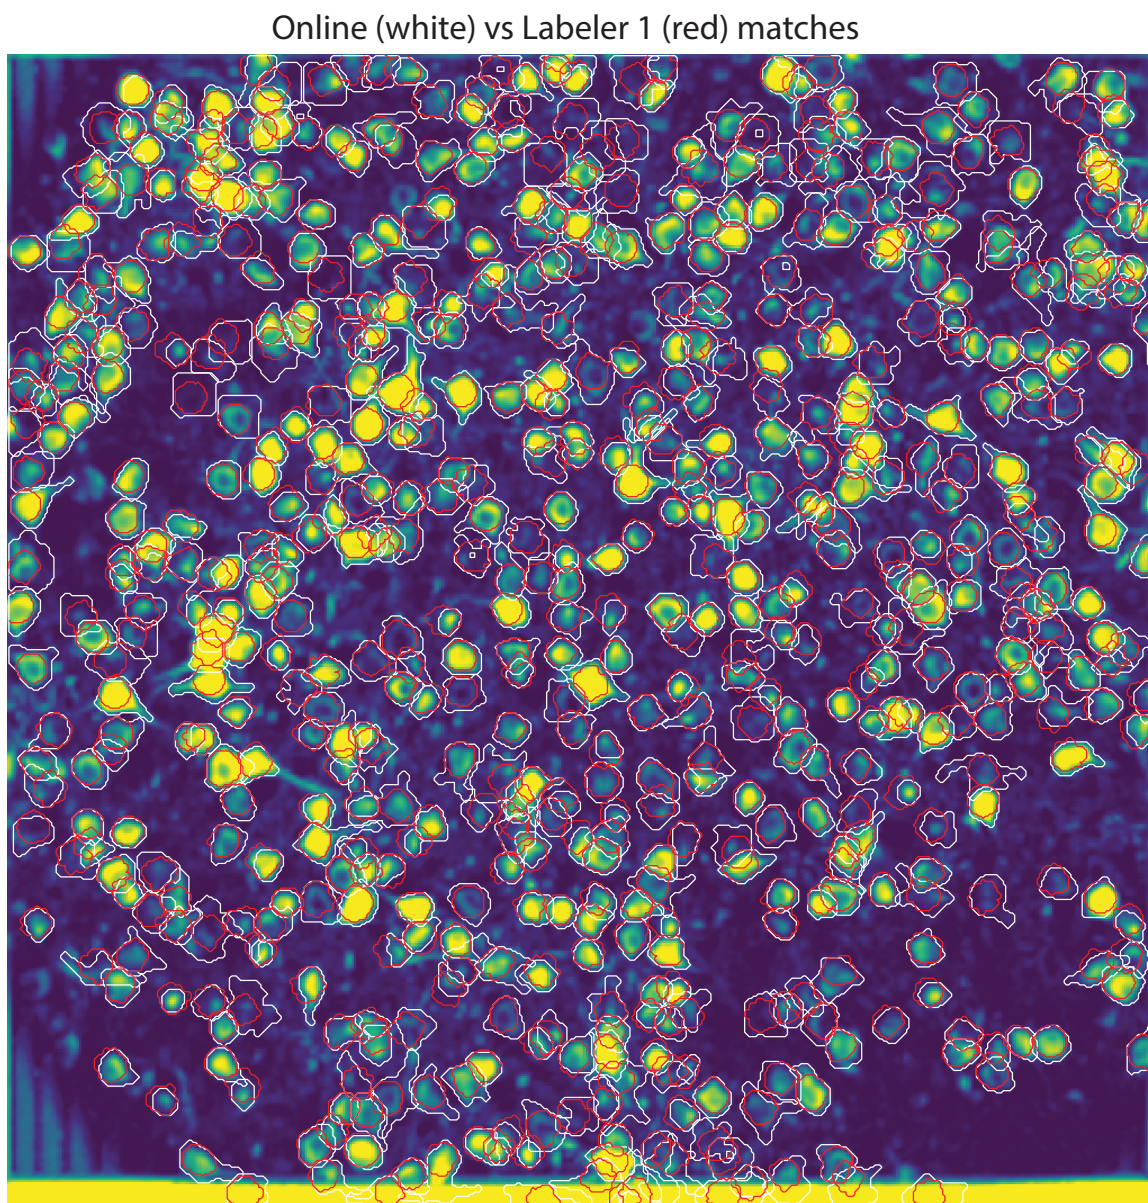

Figure S9: Matches between OnACID (white) and Labeler 1 (red).



Online (white) vs Labeler 1 (red) mis-matches

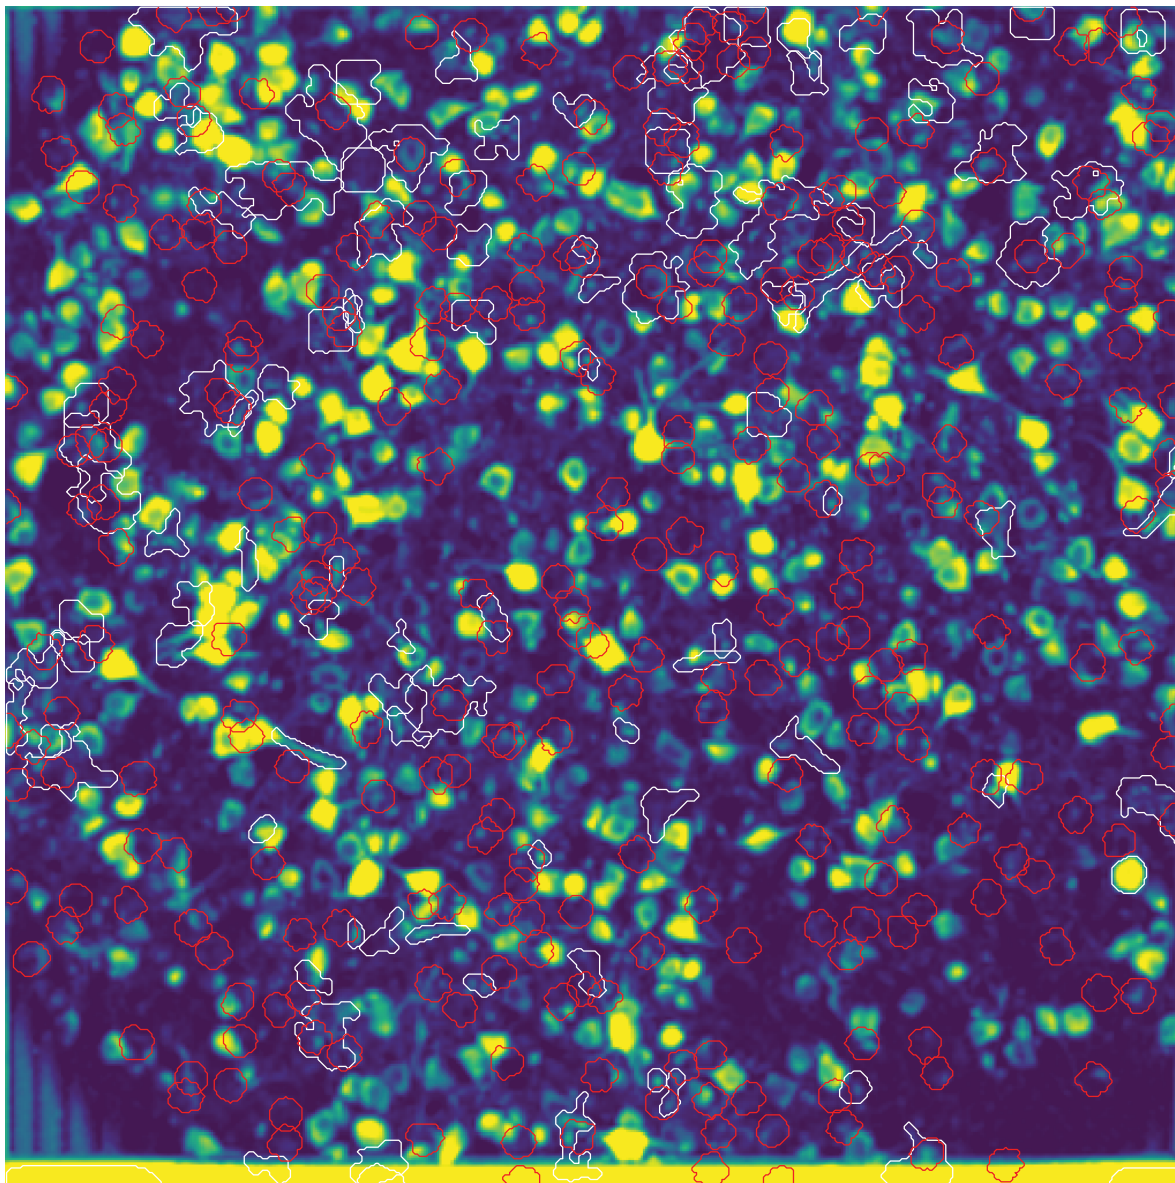

Figure S10: Mismatches between OnACID (white) and Labeler 1 (red).

Online (white) vs Labeler 2 (red) matches

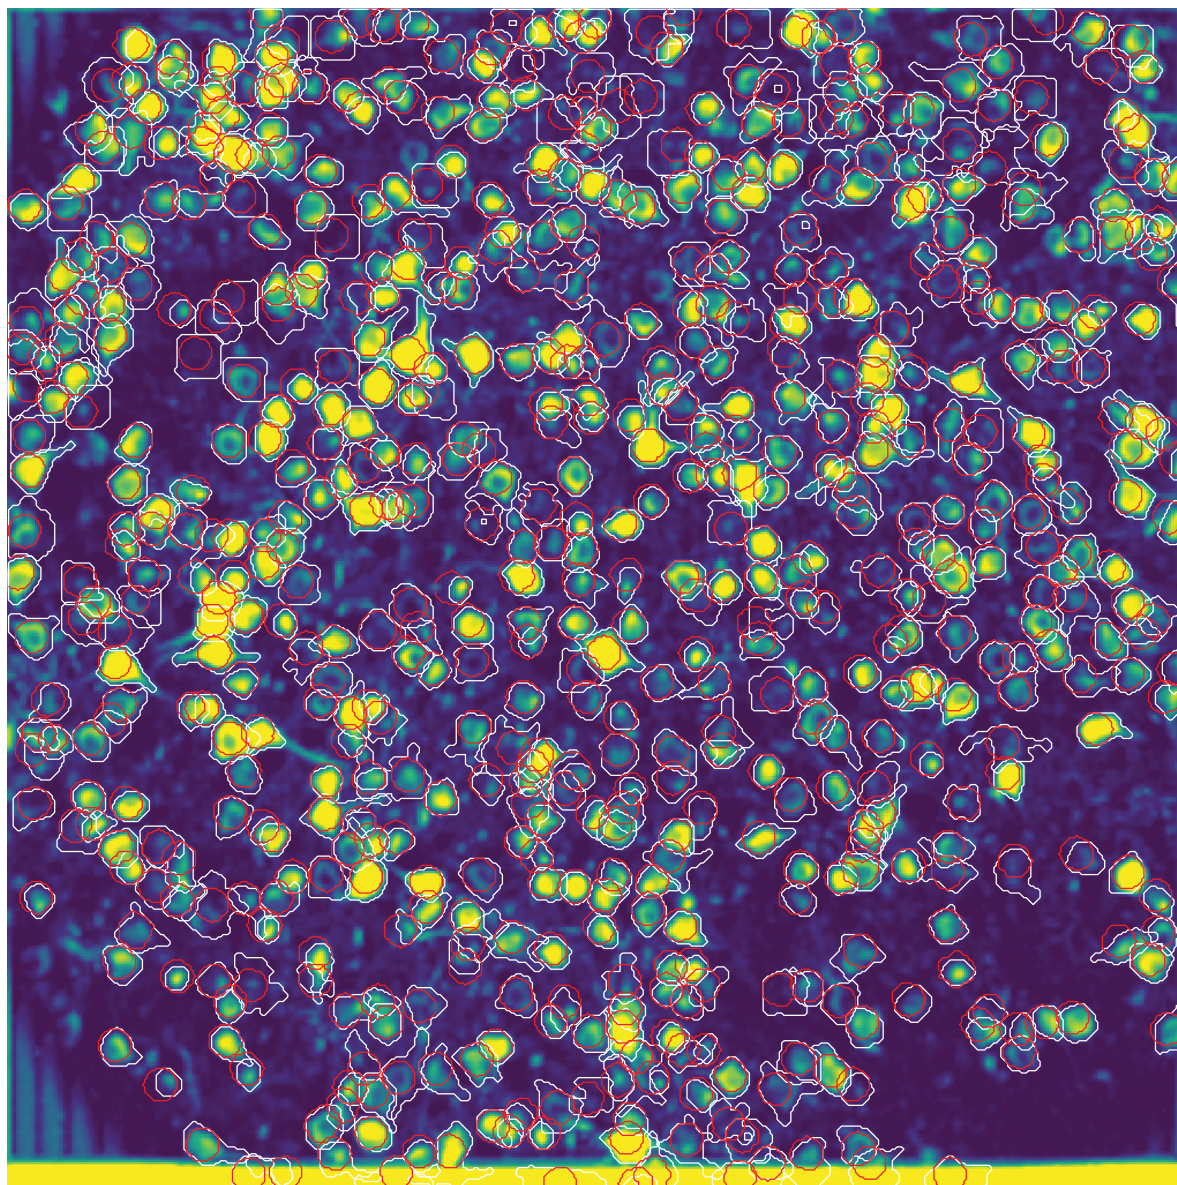

Figure S11: Matches between OnACID (white) and Labeler 2 (red).



Online (white) vs Labeler 2 (red) mis-matches

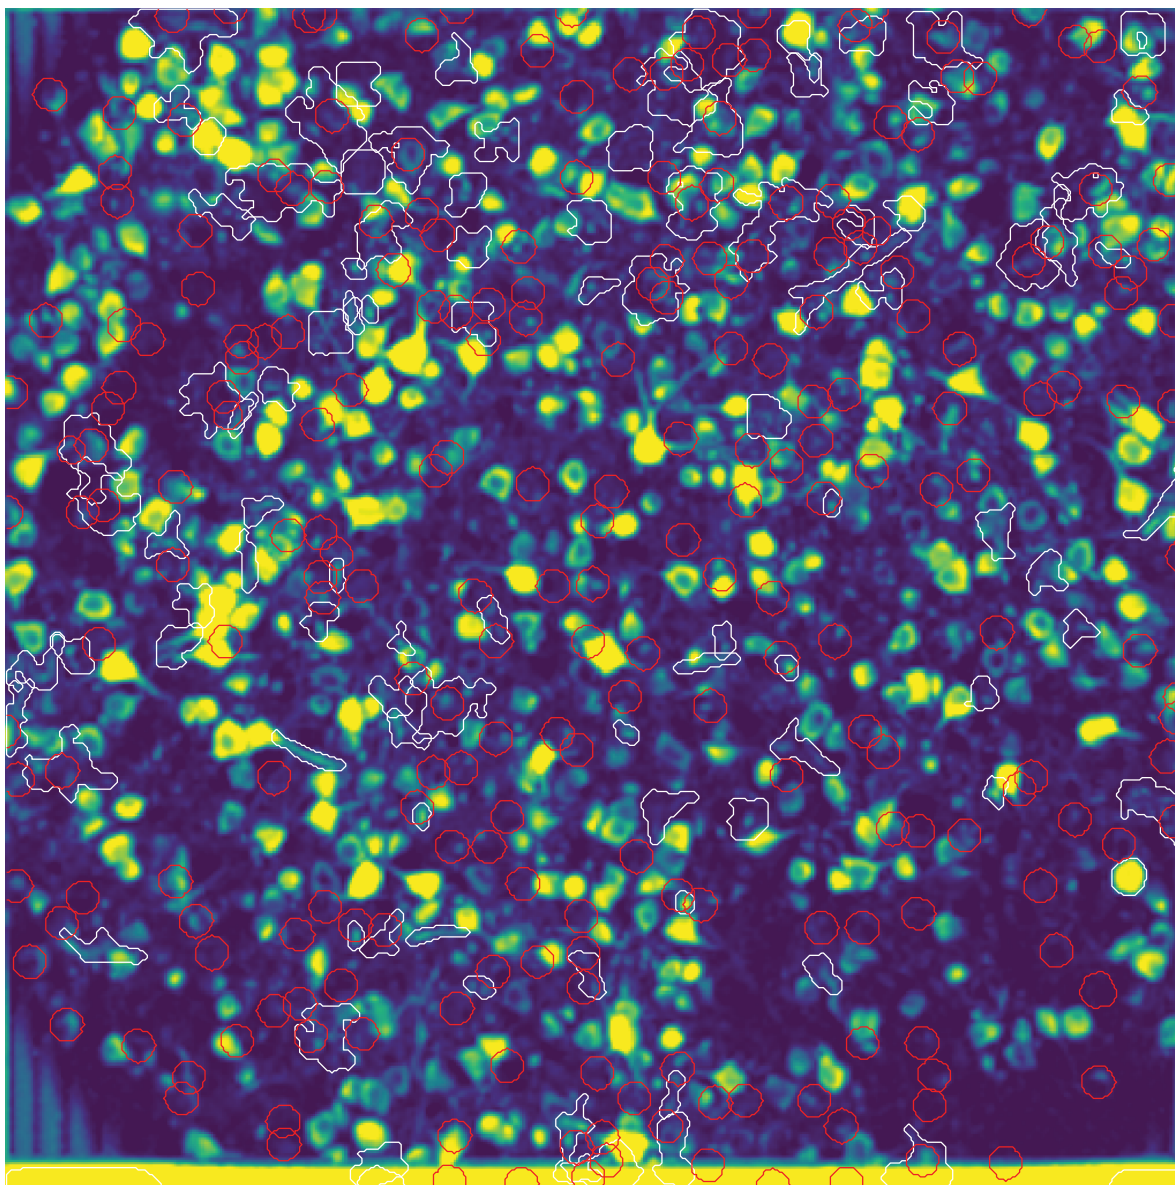

Figure S12: Mismatches between OnACID (white) and Labeler 2 (red).



Labeler 1 (red) vs Labeler 2 (white) matches

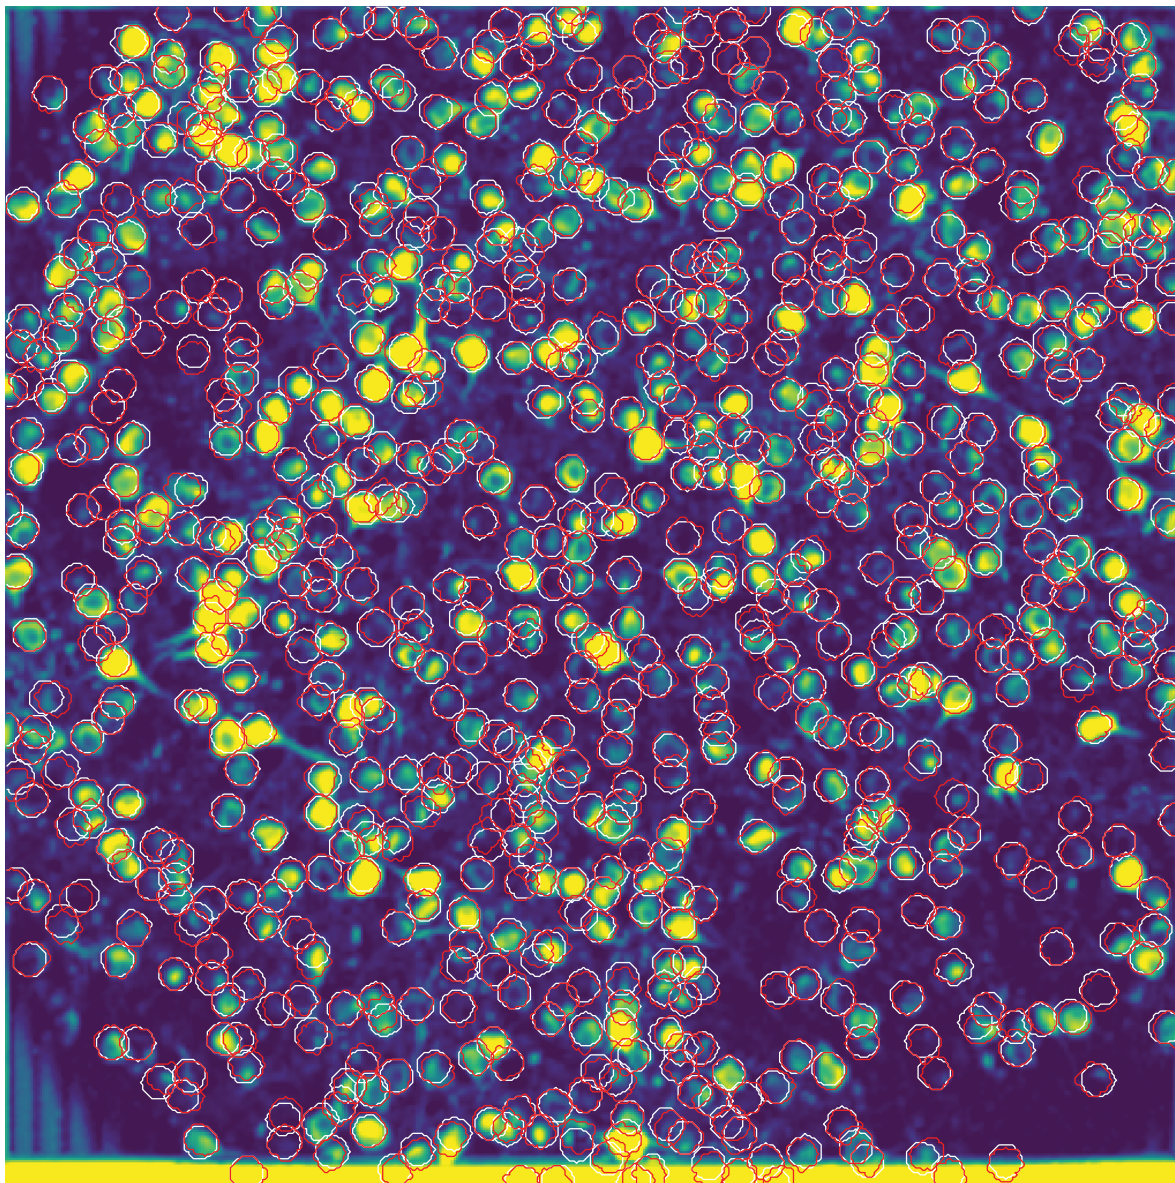

Figure S13: Matches between Labeler 1 (red) and Labeler 2 (white).

Labeler 1 (red) vs Labeler 2 (white) mis-matches

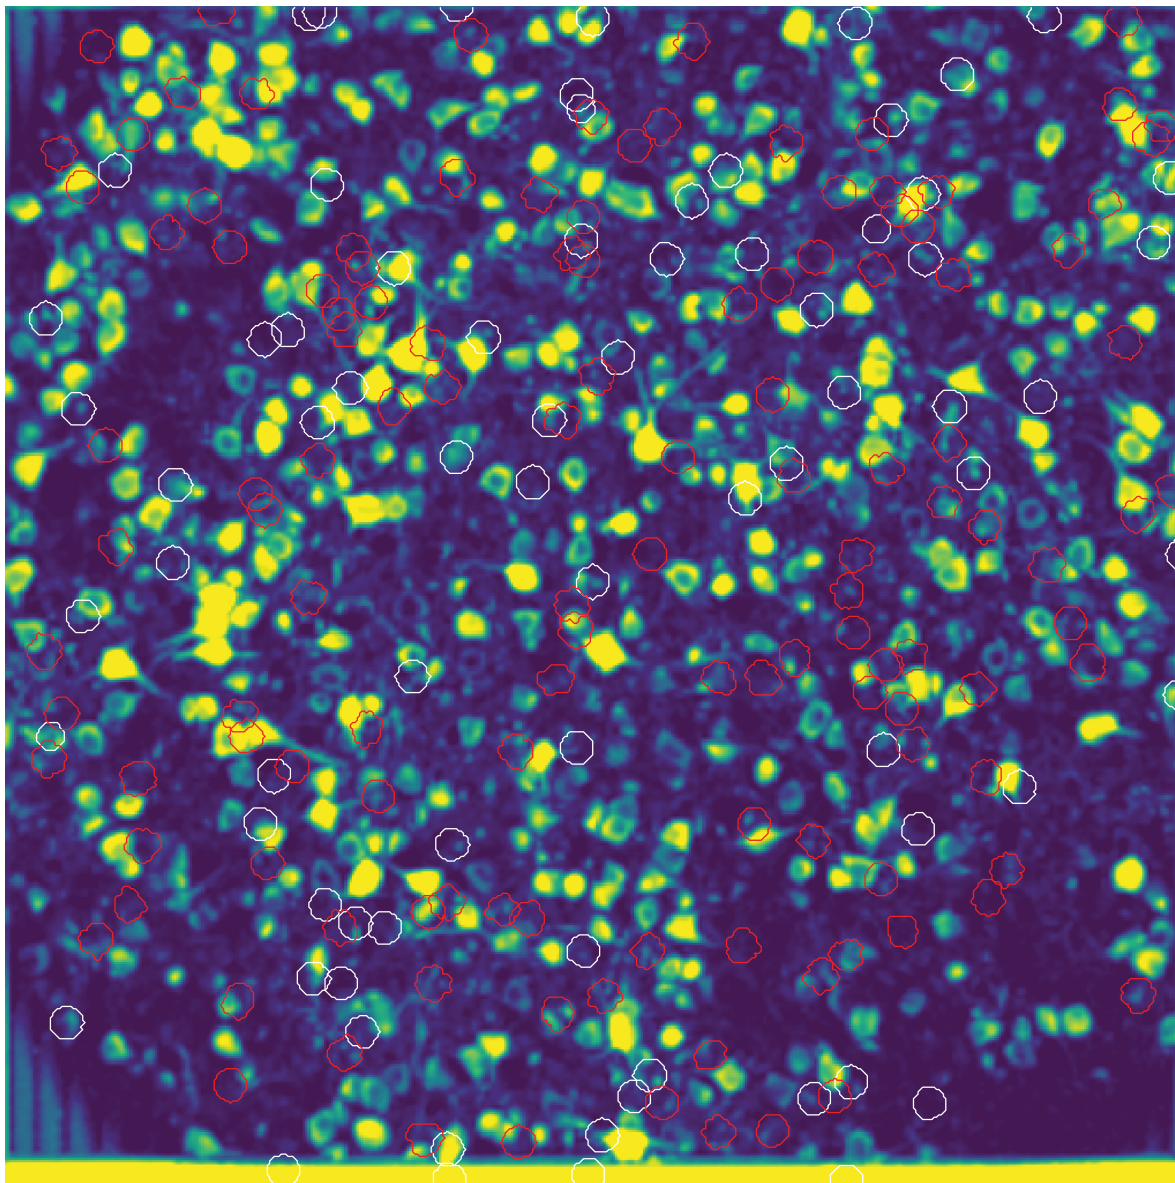

Figure S14: Mismatches between Labeler 1 (red) and Labeler 2 (white).

## References

- [1] J. Gauthier and D.W. Tank. A subset of ca1 and subiculum neurons selectively encode rewarded locations. In *Computational and Systems Neuroscience Meeting, Cosyne*, 2016.
- [2] Sue Ann Koay, Ben Engelhard, Lucas Pinto, Ben Deverett, Stephan Thiberge, Carlos Brody, and David Tank. Neural dynamics in a mouse navigation and accumulation of visual evidence task. In *Society for Neuroscience*, number 739.07, 2016.
- [3] Julien Mairal, Francis Bach, Jean Ponce, and Guillermo Sapiro. Online learning for matrix factorization and sparse coding. *Journal of Machine Learning Research*, 11(Jan):19–60, 2010.
